# Supplementary material for: Study of the Deformation/Interaction Model: How Interactions Increase the Reaction Barrier
Source: Hindawi journal article supplement (doi:10.1155/2018/3106297), 2018-01-01
Supplement: f1 [file 3106297.f1.docx]

**Study of the Deformation/Interaction Model: How Interactions Increase the Reaction Barrier**

Zhiling Liang 1, Houhe Liu 1, Nianjun Su 2, Dandan Song 1, Yun Zhang 1, Hong Huang 1, Jianqi Zheng 3, Cheng Zhong 4 and Guodong Ye 1

*1 Guangdong Provincial Key Laboratory of Molecular Target & Clinical Pharmacology，School of Pharmaceutical Sciences, Guangzhou Medical University, Guangzhou 511436, and The Fifth Affiliated Hospital of Guangzhou Medical University, Guangzhou 510700, People's Republic of China*

*2 Department of Reproductive Health and Infertility, Guangdong Women and Children Hospital, Guangzhou 510010, People’s Republic of China*

*3 The First Clinical School of Guangzhou Medical University, Guangzhou 510275, People’s Republic of China*

*4 College of Chemistry and Molecular Sciences, Wuhan University, Wuhan 430072, People’s Republic of China.*

Correspondence should be addressed to Guodong Ye; [*gzhygd@gzhmu.edu.cn*](mailto:gzhygd@gzhmu.edu.cn)

**(Gaussian 09 for quantitative calculation)**

1. basis Sets: B3LYP 6-31g(d)to6-311++g(d,p)

BD:

-------------------------------------------------------------------------------------------------------

Center Atomic Atomic Coordinates (Angstroms)

Number Number Type X Y Z

-------------------------------------------------------------------------------------------------------

1 6 0 1.546289 -0.489549 -0.080123

2 6 0 0.726351 0.548843 0.108681

3 6 0 -0.726351 0.548843 -0.108681

4 6 0 -1.546289 -0.489549 0.080123

5 1 0 2.608488 -0.410290 0.119422

6 1 0 1.153867 1.496936 0.429093

7 1 0 -1.153867 1.496936 -0.429093

8 1 0 -2.608488 -0.410290 -0.119422

9 1 0 1.185500 -1.442411 -0.452897

10 1 0 -1.185500 -1.442411 0.452897 -------------------------------------------------------------------------------------------------------

ET:

-------------------------------------------------------------------------------------------------------

Center Atomic Atomic Coordinates (Angstroms)

Number Number Type X Y Z -------------------------------------------------------------------------------------------------------

1 6 0 0.000000 0.664387 0.000000

2 1 0 0.922638 1.235345 0.000000

3 1 0 -0.922637 1.235346 0.000000

4 6 0 0.000000 -0.664387 0.000000

5 1 0 -0.922638 -1.235345 0.000000

6 1 0 0.922637 -1.235346 0.000000

-------------------------------------------------------------------------------------------------------AM:

------------------------------------------------------------------------------------------------------- Center Atomic Atomic Coordinates (Angstroms)

Number Number Type X Y Z -------------------------------------------------------------------------------------------------------

1 6 0 2.431012 -0.197281 -0.077047

2 6 0 1.058523 0.450007 -0.280869

3 1 0 3.215429 0.363625 -0.592447

4 1 0 2.695214 -0.240117 0.984365

5 1 0 2.446717 -1.221287 -0.463255

6 6 0 -0.075269 -0.313669 0.427369

7 1 0 1.081304 1.482801 0.086581

8 1 0 0.831517 0.510912 -1.350840

9 1 0 -0.119296 -1.341634 0.050377

10 1 0 0.166985 -0.382005 1.496971

11 6 0 -1.418402 0.340415 0.268965

12 6 0 -2.485422 -0.215909 -0.301164

13 1 0 -1.498541 1.357641 0.651739

14 1 0 -3.426802 0.315090 -0.388410

15 1 0 -2.455185 -1.226401 -0.698604 -------------------------------------------------------------------------------------------------------

MA: -------------------------------------------------------------------------------------------------------

Center Atomic Atomic Coordinates (Angstroms)

Number Number Type X Y Z -------------------------------------------------------------------------------------------------------

1 6 0 2.158409 -0.765812 0.000083

2 1 0 2.720190 -1.692499 -0.000067

3 1 0 2.709736 0.167619 0.000507

4 6 0 0.825634 -0.763781 -0.000243

5 1 0 0.280660 -1.698953 -0.000658

6 6 0 0.077909 0.530284 -0.000033

7 8 0 0.619181 1.606268 0.000063

8 8 0 -1.281207 0.489641 -0.000020

9 6 0 -2.016328 -0.739955 0.000103

10 1 0 -1.812038 -1.330739 -0.896472

11 1 0 -1.811671 -1.330782 0.896565

12 1 0 -3.064403 -0.446336 0.000322 -------------------------------------------------------------------------------------------------------AME:

-------------------------------------------------------------------------------------------------------

Center Atomic Atomic Coordinates (Angstroms)

Number Number Type X Y Z

------------------------------------------------------------------------------------------------------- 1 6 0 2.436617 0.191895 -0.249133

2 6 0 1.326454 -0.384272 0.202529

3 6 0 0.016236 0.320325 0.371115

4 1 0 -0.225001 0.408708 1.444099

5 1 0 0.068390 1.338834 -0.041700

6 6 0 -2.290943 0.119922 -0.095775

7 1 0 -2.994443 -0.528442 -0.618513

8 1 0 -2.563855 0.161857 0.968527

9 1 0 -2.359375 1.133648 -0.515481

10 8 0 -1.001240 -0.431069 -0.277664

11 1 0 3.369962 -0.354378 -0.323744

12 1 0 2.453334 1.232713 -0.558669

13 1 0 1.330736 -1.431611 0.494380

-------------------------------------------------------------------------------------------------------

Product:

BD+ET:

------------------------------------------------------------------------------------------------------

Center Atomic Atomic Coordinates (Angstroms)

Number Number Type X Y Z

------------------------------------------------------------------------------------------------------

1 6 0 -1.496933 0.048130 0.110437

2 6 0 -0.698361 -1.192325 -0.317468

3 6 0 0.698341 -1.192338 0.317461

4 6 0 1.496936 0.048109 -0.110427

5 6 0 0.664923 1.305140 -0.057295

6 6 0 -0.664904 1.305150 0.057292

7 1 0 -2.380754 0.166209 -0.527197

8 1 0 -1.243651 -2.102942 -0.050947

9 1 0 0.595244 -1.194691 1.409431

10 1 0 2.380745 0.166178 0.527226

11 1 0 1.194978 2.252703 -0.114042

12 1 0 -1.194945 2.252722 0.114023

13 1 0 1.886990 -0.086886 -1.129310

14 1 0 1.243618 -2.102962 0.050931

15 1 0 -0.595267 -1.194663 -1.409439

16 1 0 -1.886967 -0.086868 1.129328

------------------------------------------------------------------------------------------------------

BD+AM:

------------------------------------------------------------------------------------------------------

Center Atomic Atomic Coordinates (Angstroms)

Number Number Type X Y Z

------------------------------------------------------------------------------------------------------

1 6 0 -1.027820 -1.285050 0.304453

2 6 0 -2.447905 -1.054865 -0.230013

3 6 0 -2.857472 0.392271 -0.136648

4 6 0 -1.992057 1.381186 0.093125

5 6 0 -0.505912 1.173974 0.248273

6 1 0 -1.044630 -1.250656 1.401501

7 1 0 -2.516887 -1.386793 -1.275751

8 1 0 -3.912519 0.621939 -0.262819

9 1 0 -2.356712 2.402611 0.169809

10 1 0 0.022960 1.951527 -0.313600

11 6 0 1.399738 -0.539625 0.218689

12 1 0 1.457945 -0.527482 1.316058

13 1 0 1.632588 -1.568760 -0.084295

14 6 0 2.475097 0.392665 -0.354338

15 6 0 3.896086 -0.033415 0.028143

16 1 0 2.304158 1.418201 -0.010080

17 1 0 2.384082 0.417760 -1.447457

18 1 0 4.643865 0.645995 -0.390455

19 1 0 4.027041 -0.041888 1.114955

20 1 0 4.119288 -1.040396 -0.338392

21 6 0 -0.042123 -0.222019 -0.208522

22 1 0 -0.080352 -0.240001 -1.307664

23 1 0 -0.223448 1.329670 1.300722

24 1 0 -0.679914 -2.285847 0.027509

25 1 0 -3.163250 -1.676610 0.320979

------------------------------------------------------------------------------------------------------

BD+MA:

------------------------------------------------------------------------------------------------------

Center Atomic Atomic Coordinates (Angstroms)

Number Number Type X Y Z

------------------------------------------------------------------------------------------------------

1 6 0 -1.413424 0.580463 -0.292508

2 8 0 -1.544253 1.560724 -0.977626

3 8 0 -2.536581 -0.098723 0.072272

4 6 0 -2.499785 -1.254332 0.918402

5 1 0 -1.874770 -2.046704 0.500356

6 1 0 -2.158766 -1.001804 1.925569

7 1 0 -3.529630 -1.603855 0.969526

8 6 0 -0.050074 0.052674 0.138351

9 6 0 0.537918 -0.832665 -0.987190

10 6 0 0.914041 1.211677 0.447418

11 6 0 1.992810 -1.147906 -0.746356

12 1 0 -0.029538 -1.766127 -1.075989

13 6 0 2.264607 0.677835 0.942300

14 1 0 1.050094 1.801208 -0.462604

15 6 0 2.757963 -0.486240 0.122749

16 1 0 2.416821 -1.963818 -1.325400

17 1 0 2.196019 0.376690 1.997306

18 1 0 3.794138 -0.785209 0.256782

19 1 0 0.419950 -0.317269 -1.948676

20 1 0 3.008163 1.482402 0.918615

21 1 0 0.474504 1.881949 1.191202

22 1 0 -0.144654 -0.562508 1.037154

------------------------------------------------------------------------------------------------------

BD+AME:

------------------------------------------------------------------------------------------------------

Center Atomic Atomic Coordinates (Angstroms)

Number Number Type X Y Z

------------------------------------------------------------------------------------------------------

1 6 0 1.421839 -0.594724 0.200936

2 1 0 1.507922 -0.576222 1.300483

3 1 0 1.678340 -1.612587 -0.133345

4 6 0 3.672008 0.094661 -0.013244

5 1 0 4.279678 0.859882 -0.497437

6 1 0 3.819135 0.156072 1.074594

7 1 0 4.005128 -0.895838 -0.355365

8 8 0 2.326427 0.339479 -0.368000

9 6 0 -0.001310 -0.248598 -0.218904

10 6 0 -1.002958 -1.287791 0.309916

11 6 0 -0.411196 1.161440 0.238680

12 6 0 -2.419020 -1.016084 -0.217612

13 1 0 -0.688328 -2.299843 0.033403

14 6 0 -1.889951 1.410080 0.083444

15 1 0 -0.123526 1.306396 1.291055

16 6 0 -2.784120 0.444162 -0.134905

17 1 0 -3.832418 0.702141 -0.261989

18 1 0 -0.032531 -0.272020 -1.316103

19 1 0 -1.013695 -1.247850 1.406601

20 1 0 0.155287 1.909642 -0.323064

21 1 0 -2.504458 -1.355287 -1.259576

22 1 0 -3.148181 -1.611165 0.344321

23 1 0 -2.225521 2.441972 0.150559

------------------------------------------------------------------------------------------------------

TS:

BD+ET:

------------------------------------------------------------------------------------------------------

Center Atomic Atomic Coordinates (Angstroms)

Number Number Type X Y Z

------------------------------------------------------------------------------------------------------

1 6 0 -3.779741 0.241576 3.921962

2 6 0 -3.255047 -0.546369 4.931467

3 6 0 -2.707782 0.008970 6.097006

4 6 0 -2.661468 1.376770 6.303823

5 6 0 -1.491632 2.093218 4.528160

6 6 0 -2.032428 1.545407 3.372391

7 1 0 -1.529987 0.725241 2.877457

8 1 0 -0.568041 1.699396 4.930748

9 1 0 -2.122859 1.774499 7.157224

10 1 0 -2.117661 -0.636380 6.741591

11 1 0 -3.064287 -1.596320 4.727890

12 1 0 -3.449645 2.016669 5.930565

13 1 0 -1.700965 3.126123 4.780492

14 1 0 -2.660954 2.154481 2.733410

15 1 0 -4.081431 -0.213228 2.984590

16 1 0 -4.280504 1.171769 4.153584

------------------------------------------------------------------------------------------------------

BD+AM:

------------------------------------------------------------------------------------------------------

Center Atomic Atomic Coordinates (Angstroms)

Number Number Type X Y Z

------------------------------------------------------------------------------------------------------

1 6 0 -3.892094 2.415308 -2.292392

2 6 0 -8.002590 2.975704 -4.539752

3 6 0 -1.804230 4.193155 -1.581571

4 6 0 -2.730375 5.217067 -1.336993

5 6 0 -3.814218 5.433456 -2.165214

6 1 0 -3.815052 1.827572 -3.202279

7 1 0 -3.556790 1.909941 -1.396659

8 1 0 -3.747932 5.239055 -3.226681

9 6 0 -1.947637 3.327527 -2.656864

10 1 0 -1.280120 2.476980 -2.749116

11 1 0 -5.280867 3.620753 -1.222777

12 1 0 -1.105575 3.933461 -0.791382

13 1 0 -2.704127 5.709180 -0.368608

14 1 0 -6.669943 1.653087 -3.461352

15 1 0 -4.583807 6.141689 -1.877580

16 6 0 -5.827686 3.643424 -3.364800

17 1 0 -6.206035 4.671434 -3.331493

18 1 0 -5.277810 3.546324 -4.310061

19 6 0 -7.033429 2.683855 -3.390153

20 1 0 -7.565216 2.754142 -2.434073

21 1 0 -8.406798 3.990642 -4.470055

22 1 0 -8.847416 2.281386 -4.534156

23 1 0 -7.504987 2.884874 -5.510641

24 6 0 -4.890002 3.383955 -2.206133

25 1 0 -2.341768 3.687238 -3.598721

------------------------------------------------------------------------------------------------------

BD+MA:

------------------------------------------------------------------------------------------------------

Center Atomic Atomic Coordinates (Angstroms)

Number Number Type X Y Z

------------------------------------------------------------------------------------------------------

1 6 0 4.734651 0.464439 6.380092

2 8 0 3.941578 1.286912 5.968647

3 8 0 5.092378 -0.549667 5.537597

4 6 0 5.922007 -1.626705 5.978462

5 1 0 6.933828 -1.285553 6.216896

6 1 0 5.489682 -2.138334 6.842390

7 1 0 5.969997 -2.319201 5.139474

8 6 0 5.343793 0.535023 7.712384

9 6 0 7.240266 2.006181 6.773502

10 6 0 4.739664 1.337867 8.685547

11 6 0 7.633194 2.549430 7.970379

12 1 0 7.925877 1.399304 6.192902

13 1 0 3.715010 1.639013 8.497490

14 6 0 5.367653 3.253080 8.587437

15 6 0 6.737403 3.198737 8.838994

16 1 0 8.636562 2.346380 8.334370

17 1 0 4.733773 3.742441 9.319935

18 1 0 7.097441 3.477060 9.825321

19 1 0 6.358984 2.350795 6.252434

20 1 0 5.007437 3.338535 7.568234

21 1 0 4.977878 1.136806 9.722611

22 1 0 6.117320 -0.161101 7.996078

------------------------------------------------------------------------------------------------------

BD+AME:

------------------------------------------------------------------------------------------------------

Center Atomic Atomic Coordinates (Angstroms)

Number Number Type X Y Z

------------------------------------------------------------------------------------------------------

1 6 0 -2.409870 -6.604252 2.694988

2 1 0 -2.382359 -5.946360 1.809499

3 1 0 -1.732962 -7.449703 2.483482

4 6 0 -4.172028 -7.906194 1.817634

5 1 0 -5.175556 -8.250681 2.068824

6 1 0 -4.215549 -7.331973 0.880956

7 1 0 -3.522074 -8.779188 1.662355

8 8 0 -3.721058 -7.109376 2.894562

9 6 0 -1.925716 -5.865551 3.914031

10 6 0 -0.808237 -5.041247 3.825097

11 6 0 -3.754005 -4.483992 4.252040

12 6 0 -1.392790 -2.925144 3.803835

13 1 0 -0.169679 -4.915811 4.688447

14 6 0 -3.284794 -3.584049 5.188222

15 1 0 -3.623299 -4.301733 3.194150

16 6 0 -2.136804 -2.808469 4.967288

17 1 0 -1.704703 -2.279013 5.811821

18 1 0 -2.147296 -6.348931 4.857469

19 1 0 -0.305023 -4.935245 2.868675

20 1 0 -4.557171 -5.167314 4.494699

21 1 0 -0.449669 -2.395703 3.716598

22 1 0 -1.881160 -3.127113 2.859140

23 1 0 -3.690254 -3.618908 6.195757

------------------------------------------------------------------------------------------------------

2 basis Sets: ωB97X-D 6-31g(d)to6-311++g(d,p)

BD:

-------------------------------------------------------------------------------------------------------

Center Atomic Atomic Coordinates (Angstroms)

Number Number Type X Y Z

------------------------------------------------------------------------------------------------------

1 6 0 0.298515 1.507381 -0.488108

2 6 0 0.298515 0.671728 0.548886

3 6 0 -0.298515 -0.671728 0.548886

4 6 0 -0.298515 -1.507381 -0.488108

5 1 0 0.771419 2.480750 -0.426010

6 1 0 0.751086 0.993941 1.484336

7 1 0 -0.751086 -0.993941 1.484336

8 1 0 -0.771419 -2.480750 -0.426010

9 1 0 -0.189431 1.249502 -1.422995

10 1 0 0.189431 -1.249502 -1.422995

------------------------------------------------------------------------------------------------------

ET:

-------------------------------------------------------------------------------------------------------

Center Atomic Atomic Coordinates (Angstroms)

Number Number Type X Y Z

-------------------------------------------------------------------------------------------------------

1 6 0 0.000000 0.662726 0.000000

2 1 0 0.924053 1.231788 0.000000

3 1 0 -0.924048 1.231794 0.000000

4 6 0 0.000000 -0.662726 0.000000

5 1 0 -0.924053 -1.231788 0.000000

6 1 0 0.924048 -1.231794 0.000000

-------------------------------------------------------------------------------------------------------

AM:

-----------------------------------------------------------------------------------------------------

Center Atomic Atomic Coordinates (Angstroms)

Number Number Type X Y Z

-----------------------------------------------------------------------------------------------------

1 6 0 2.416242 -0.199229 -0.079345

2 6 0 1.049325 0.445789 -0.288339

3 1 0 3.200701 0.347769 -0.608309

4 1 0 2.681187 -0.222608 0.982260

5 1 0 2.423214 -1.230464 -0.445558

6 6 0 -0.071754 -0.301604 0.442584

7 1 0 1.075259 1.485725 0.057453

8 1 0 0.813677 0.482775 -1.357344

9 1 0 -0.113884 -1.338433 0.090238

10 1 0 0.171770 -0.341975 1.512453

11 6 0 -1.413079 0.345189 0.267870

12 6 0 -2.467160 -0.224745 -0.304532

13 1 0 -1.501278 1.366916 0.636598

14 1 0 -3.411331 0.298320 -0.409059

15 1 0 -2.420766 -1.240417 -0.688155

-----------------------------------------------------------------------------------------------------

AME:

------------------------------------------------------------------------------------------------------

Center Atomic Atomic Coordinates (Angstroms)

Number Number Type X Y Z

------------------------------------------------------------------------------------------------------

1 6 0 2.432937 0.194401 -0.236009

2 6 0 1.319027 -0.387207 0.188465

3 6 0 0.011728 0.319770 0.352596

4 1 0 -0.211501 0.440835 1.426233

5 1 0 0.061513 1.326514 -0.089983

6 6 0 -2.277078 0.126471 -0.094865

7 1 0 -2.995274 -0.539675 -0.572952

8 1 0 -2.537338 0.231303 0.968433

9 1 0 -2.338441 1.116797 -0.568477

10 8 0 -1.004184 -0.443295 -0.256850

11 1 0 3.366605 -0.352033 -0.306476

12 1 0 2.452098 1.241401 -0.525473

13 1 0 1.316130 -1.439391 0.462372

------------------------------------------------------------------------------------------------------

MA:

-------------------------------------------------------------------------------------------------------

Center Atomic Atomic Coordinates (Angstroms)

Number Number Type X Y Z

-------------------------------------------------------------------------------------------------------

1 6 0 2.149019 -0.755232 0.000158

2 1 0 2.717276 -1.678250 -0.000008

3 1 0 2.690159 0.184850 0.000707

4 6 0 0.820317 -0.765606 -0.000297

5 1 0 0.283498 -1.705961 -0.000838

6 6 0 0.070306 0.527814 -0.000060

7 8 0 0.614472 1.597319 -0.000011

8 8 0 -1.277621 0.488083 -0.000023

9 6 0 -1.998842 -0.736533 0.000161

10 1 0 -1.790577 -1.326236 -0.896720

11 1 0 -1.790119 -1.326241 0.896931

12 1 0 -3.049858 -0.454034 0.000429

-------------------------------------------------------------------------------------------------------

Product

BD+ET:

----------------------------------------------------------------------------------------------------

Center Atomic Atomic Coordinates (Angstroms)

Number Number Type X Y Z

----------------------------------------------------------------------------------------------------

1 6 0 -1.492198 0.044968 0.111105

2 6 0 -0.693175 -1.185972 -0.322230

3 6 0 0.693176 -1.185978 0.322212

4 6 0 1.492201 0.044975 -0.111080

5 6 0 0.663037 1.300415 -0.057893

6 6 0 -0.663043 1.300414 0.057885

7 1 0 -2.378028 0.164275 -0.521603

8 1 0 -1.237839 -2.099572 -0.067421

9 1 0 0.579384 -1.176264 1.412947

10 1 0 2.377998 0.164287 0.521673

11 1 0 1.191901 2.248305 -0.115671

12 1 0 -1.191911 2.248304 0.115628

13 1 0 1.872079 -0.093223 -1.132375

14 1 0 1.237844 -2.099570 0.067379

15 1 0 -0.579389 -1.176222 -1.412966

16 1 0 -1.872021 -0.093247 1.132418

----------------------------------------------------------------------------------------------------

BD+AM:

-----------------------------------------------------------------------------------------------------

Center Atomic Atomic Coordinates (Angstroms)

Number Number Type X Y Z

-----------------------------------------------------------------------------------------------------

1 6 0 -1.029720 -1.279529 0.312371

2 6 0 -2.438862 -1.046083 -0.231866

3 6 0 -2.837506 0.401499 -0.140842

4 6 0 -1.967528 1.381037 0.090858

5 6 0 -0.486845 1.161400 0.246967

6 1 0 -1.050360 -1.223848 1.408584

7 1 0 -2.498423 -1.373447 -1.278520

8 1 0 -3.890076 0.639149 -0.270700

9 1 0 -2.325622 2.404486 0.168331

10 1 0 0.048836 1.933911 -0.314623

11 6 0 1.392099 -0.558931 0.206169

12 1 0 1.445000 -0.601746 1.303181

13 1 0 1.637328 -1.567938 -0.149510

14 6 0 2.448575 0.416616 -0.310792

15 6 0 3.870921 -0.039699 0.002947

16 1 0 2.284108 1.407104 0.126417

17 1 0 2.329707 0.535113 -1.394698

18 1 0 4.611522 0.678963 -0.357154

19 1 0 4.015707 -0.156871 1.081432

20 1 0 4.084922 -1.005246 -0.465553

21 6 0 -0.042753 -0.232815 -0.211477

22 1 0 -0.089851 -0.251769 -1.310285

23 1 0 -0.204819 1.308806 1.300112

24 1 0 -0.686462 -2.286235 0.052730

25 1 0 -3.161799 -1.661397 0.314245

-----------------------------------------------------------------------------------------------------

BD+AME：

------------------------------------------------------------------------------------------------------

Center Atomic Atomic Coordinates (Angstroms)

Number Number Type X Y Z

------------------------------------------------------------------------------------------------------

1 6 0 1.416561 -0.599907 0.183350

2 1 0 1.500179 -0.602728 1.284174

3 1 0 1.673570 -1.612024 -0.169084

4 6 0 3.643909 0.097073 -0.007049

5 1 0 4.254755 0.871065 -0.472573

6 1 0 3.783357 0.139681 1.082915

7 1 0 3.982428 -0.886808 -0.363398

8 8 0 2.309499 0.341346 -0.363230

9 6 0 -0.002971 -0.251601 -0.225201

10 6 0 -0.998648 -1.279888 0.317013

11 6 0 -0.399354 1.152973 0.238174

12 6 0 -2.407059 -1.011762 -0.214622

13 1 0 -0.685429 -2.296001 0.055147

14 6 0 -1.873780 1.407721 0.083420

15 1 0 -0.114735 1.286627 1.292206

16 6 0 -2.768279 0.446855 -0.133914

17 1 0 -3.815531 0.707501 -0.262179

18 1 0 -0.047942 -0.275597 -1.321884

19 1 0 -1.008544 -1.220358 1.412972

20 1 0 0.171425 1.900158 -0.319403

21 1 0 -2.486007 -1.347566 -1.257161

22 1 0 -3.138797 -1.603559 0.345399

23 1 0 -2.206986 2.440059 0.151693

------------------------------------------------------------------------------------------------------

BD+MA：

TS

BD+ET:

------------------------------------------------------------------------------------------------------

Center Atomic Atomic Coordinates (Angstroms)

Number Number Type X Y Z

------------------------------------------------------------------------------------------------------

1 6 0 -3.786157 0.247715 3.935347

2 6 0 -3.249179 -0.538922 4.929109

3 6 0 -2.696377 0.016888 6.092023

4 6 0 -2.662673 1.377505 6.298737

5 6 0 -1.493266 2.082842 4.522917

6 6 0 -2.037235 1.538535 3.376474

7 1 0 -1.547212 0.707432 2.886679

8 1 0 -0.576402 1.678440 4.931158

9 1 0 -2.122501 1.781293 7.148593

10 1 0 -2.092888 -0.623683 6.728691

11 1 0 -3.051334 -1.585936 4.718251

12 1 0 -3.449377 2.015239 5.916444

13 1 0 -1.700208 3.116252 4.777127

14 1 0 -2.669960 2.147326 2.740592

15 1 0 -4.094219 -0.202608 2.997585

16 1 0 -4.275444 1.183507 4.172633

------------------------------------------------------------------------------------------------------

BD+AM:

------------------------------------------------------------------------------------------------------

Center Atomic Atomic Coordinates (Angstroms)

Number Number Type X Y Z

------------------------------------------------------------------------------------------------------

1 6 0 -3.923022 2.416065 -2.280917

2 6 0 -7.961035 2.981384 -4.541539

3 6 0 -1.814653 4.177213 -1.622844

4 6 0 -2.738162 5.194502 -1.341978

5 6 0 -3.831967 5.417547 -2.143407

6 1 0 -3.856242 1.842205 -3.200958

7 1 0 -3.558184 1.912952 -1.395342

8 1 0 -3.787540 5.231412 -3.208608

9 6 0 -1.975484 3.337411 -2.704603

10 1 0 -1.311188 2.487967 -2.826936

11 1 0 -5.278397 3.625002 -1.183592

12 1 0 -1.098819 3.905323 -0.852608

13 1 0 -2.696315 5.668580 -0.365507

14 1 0 -6.582096 1.663259 -3.524879

15 1 0 -4.598057 6.120578 -1.833124

16 6 0 -5.834074 3.672667 -3.323473

17 1 0 -6.248502 4.683864 -3.242728

18 1 0 -5.271732 3.641599 -4.266484

19 6 0 -6.992545 2.671361 -3.403681

20 1 0 -7.530103 2.670389 -2.448608

21 1 0 -8.410977 3.971301 -4.417575

22 1 0 -8.771533 2.249438 -4.584925

23 1 0 -7.448242 2.969294 -5.508422

24 6 0 -4.899193 3.390640 -2.172288

25 1 0 -2.418443 3.699253 -3.624481

------------------------------------------------------------------------------------------------------

BD+AME:

-------------------------------------------------------------------------------------------------------

Center Atomic Atomic Coordinates (Angstroms)

Number Number Type X Y Z -------------------------------------------------------------------------------------------------------

1 6 0 -3.156962 -6.367075 2.855539

2 1 0 -4.252537 -6.280647 2.907464

3 1 0 -2.823069 -5.808063 1.964177

4 6 0 -3.411334 -8.332866 1.610577

5 1 0 -3.077616 -9.370281 1.577828

6 1 0 -4.507845 -8.312607 1.694370

7 1 0 -3.125290 -7.836226 0.671651

8 8 0 -2.799139 -7.728341 2.719806

9 6 0 -2.511266 -5.799452 4.086232

10 6 0 -1.180932 -5.431109 4.057929

11 6 0 -3.778083 -3.872676 4.133761

12 6 0 -1.016127 -3.249901 3.807983

13 1 0 -0.600045 -5.433183 4.970590

14 6 0 -3.099257 -3.102041 5.046142

15 1 0 -3.523220 -3.841447 3.081751

16 6 0 -1.742514 -2.785102 4.882430

17 1 0 -1.210941 -2.358484 5.727983

18 1 0 -2.958149 -6.082073 5.031285

19 1 0 -0.615491 -5.587307 3.144555

20 1 0 -4.785354 -4.211241 4.352508

21 1 0 0.055045 -3.081451 3.769477

22 1 0 -1.485721 -3.392153 2.842524

23 1 0 -3.556204 -2.912221 6.013006 -------------------------------------------------------------------------------------------------------

BD+MA:

-------------------------------------------------------------------------------------------------------

Center Atomic Atomic Coordinates (Angstroms)

Number Number Type X Y Z -------------------------------------------------------------------------------------------------------

1 6 0 4.633612 0.379544 6.591783

2 8 0 3.763643 1.149157 6.254502

3 8 0 4.955473 -0.625012 5.743719

4 6 0 5.930645 -1.593029 6.093767

5 1 0 5.657131 -2.128695 7.007131

6 1 0 5.958566 -2.296765 5.263658

7 1 0 6.920155 -1.140489 6.212378

8 6 0 5.375195 0.520518 7.850829

9 6 0 7.093403 1.915762 6.610580

10 6 0 4.857152 1.363488 8.824573

11 6 0 7.601891 2.548672 7.709371

12 1 0 7.721378 1.266663 6.009807

13 1 0 3.815016 1.647587 8.725815

14 6 0 5.410549 3.290808 8.488898

15 6 0 6.789225 3.263207 8.607438

16 1 0 8.636544 2.370134 7.987817

17 1 0 4.840528 3.829116 9.239464

18 1 0 7.240739 3.625609 9.526468

19 1 0 6.164638 2.227644 6.152001

20 1 0 4.938357 3.254038 7.512296

21 1 0 5.221573 1.257057 9.838813

22 1 0 6.190962 -0.143578 8.090070 -------------------------------------------------------------------------------------------------------
